# Supplementary material for: Radical homopolymerization of vinyl ethers activated by Li+-π complexation in the presence of CH3OLi and LiI
Source: Royal Society of Chemistry journal article supplement (doi:10.1039/d1py01619a), 2022-01-01
Supplement: d1py01619a1.pdf [file d1py01619a1.pdf]

## Supplementary information

### Contents

Figure S1.  $^{13}\text{C}$  NMR spectrum of poly(DEGV).

Figure S2.  $^{13}\text{C}$  NMR spectrum of poly(HBVE).

Figure S3.  $^{13}\text{C}$  NMR spectrum of poly(HEVE).

Figure S4.  $^1\text{H}$  NMR spectrum of polymerization mixture of DEGV.

Table S1.  $^1\text{H}$  chemical shifts of vinyl group adjacent to ether oxygen in vinyl ethers.

Figure S5.  $^1\text{H}$  NMR spectrum of polymerization mixture of IBVE.

Figure S6.  $^{13}\text{C}$  NMR spectrum of poly(IBVE).

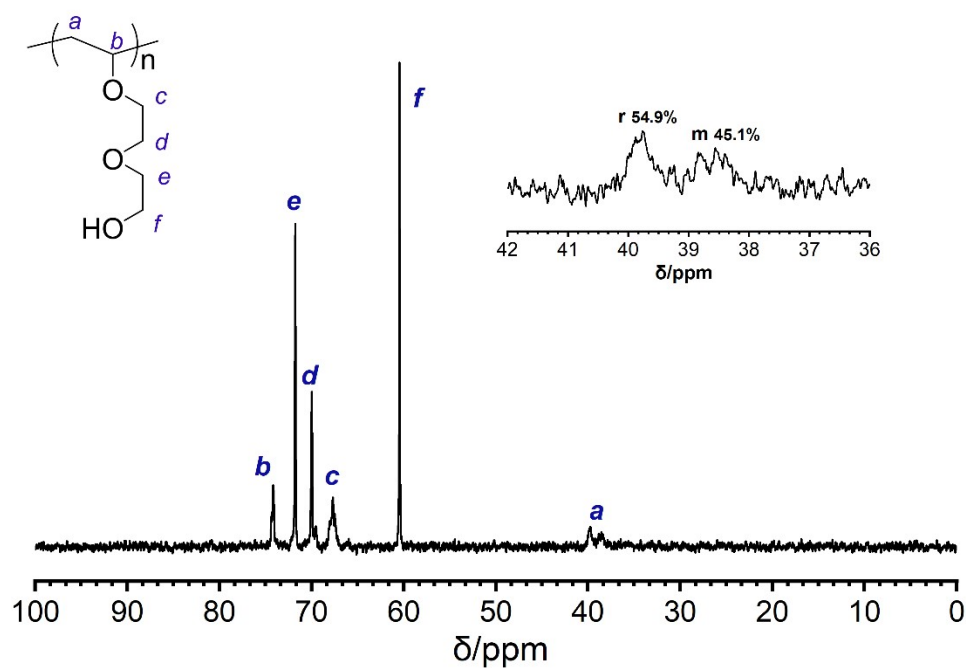

Figure S1.  $^{13}\text{C}$  NMR spectrum of poly(DEGV) in  $\text{D}_2\text{O}$ . The inset shows the chemical structures of the poly(DEGV) with full peak assignments. The structures correspond to those estimated in Figure S1.

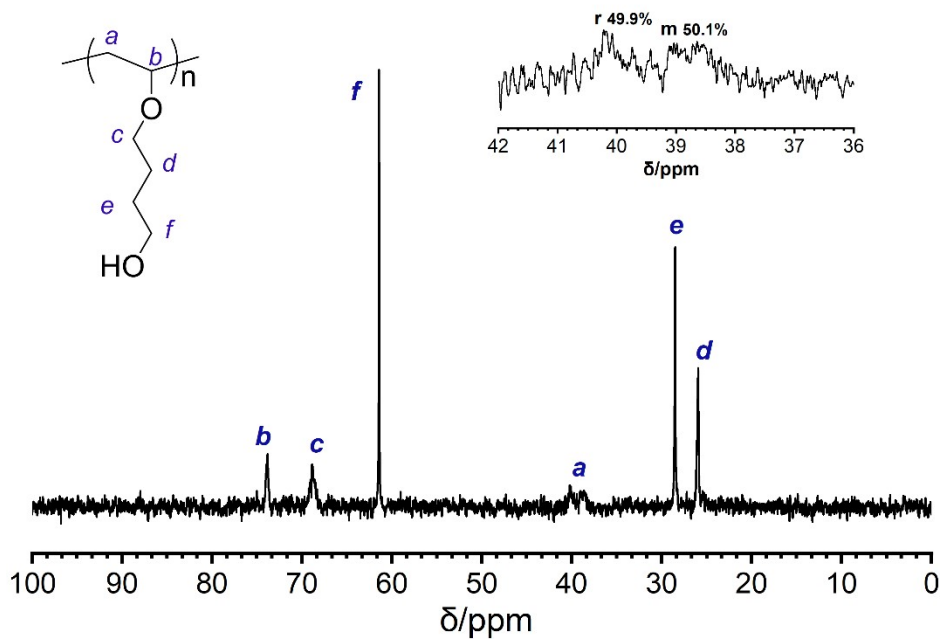

Figure S2.  $^{13}\text{C}$  NMR spectrum of poly(HBVE) in  $\text{D}_2\text{O}$ . The inset shows the chemical structures of the poly(HBVE) with full peak assignments. The structures correspond to those estimated in Figure S2.

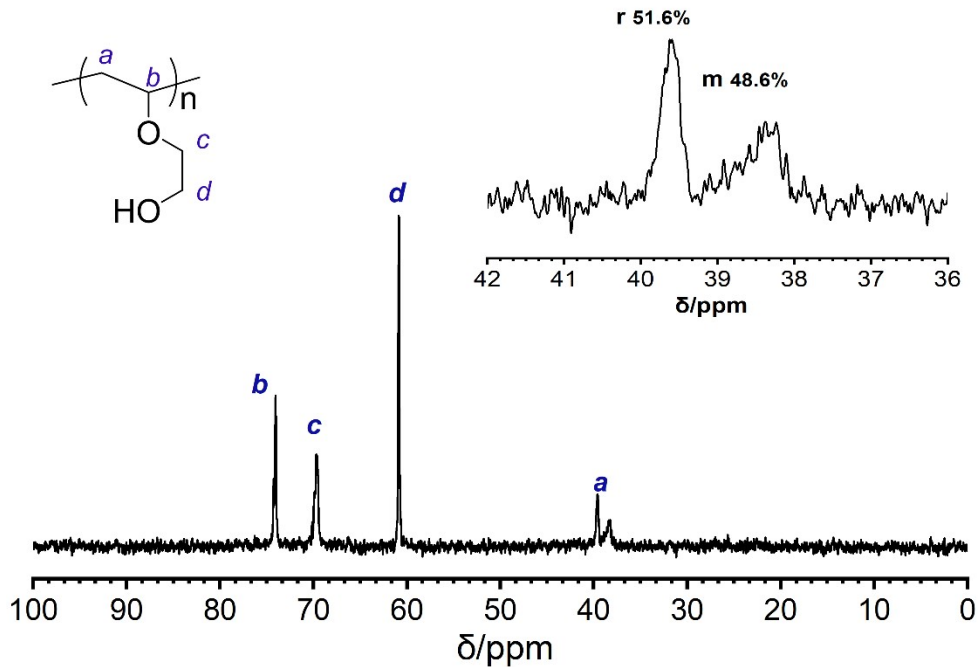

Figure S3.  $^{13}\text{C}$  NMR spectrum of poly(HEVE) in  $\text{D}_2\text{O}$ . The inset shows the chemical structures of the poly(HEVE) with full peak assignments. The structures correspond to those estimated in Figure S3.

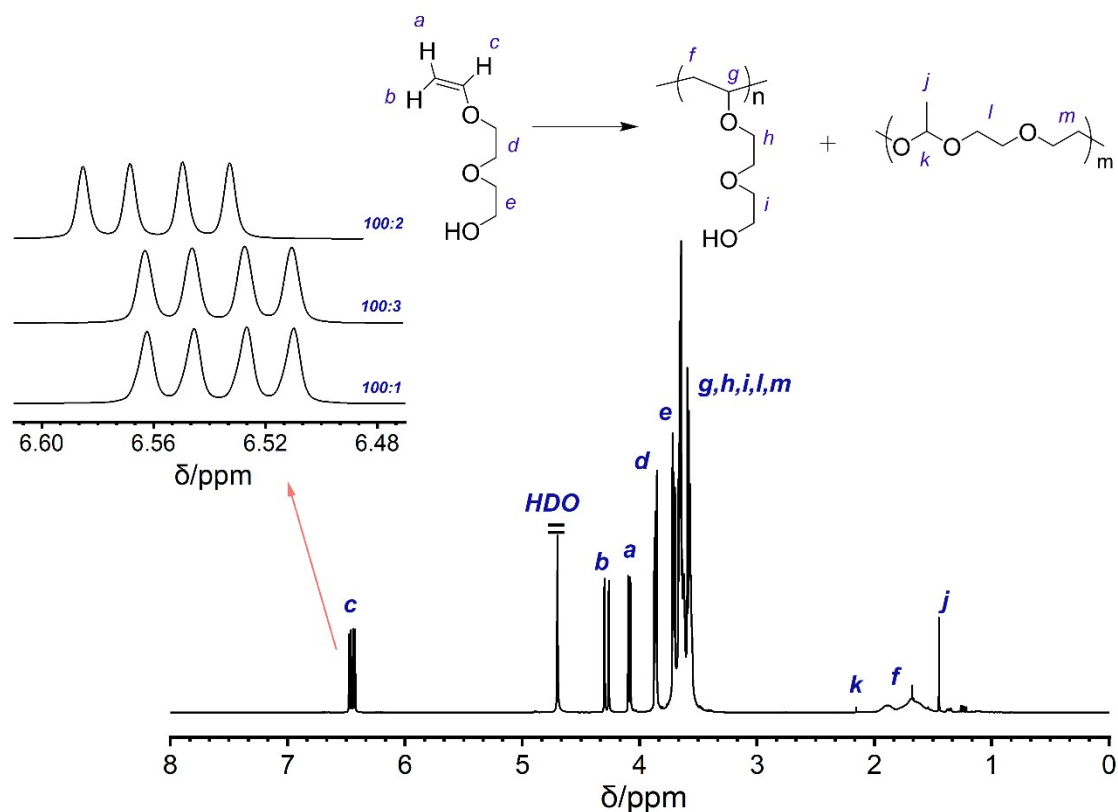

Figure S4.  $^1\text{H}$  NMR spectrum (in  $\text{D}_2\text{O}$  at  $20^\circ\text{C}$ ) of polymerization mixture of DEGV. The acetal contents (%) were calculated by the peak intensity ratio of the methyl proton of (poly)acetals at 1.1–1.2 ppm and the methylene proton of the main chain derived from poly (hydroxyl-functional vinyl ether) at 1.3–1.9 ppm.

Table S1.  $^1\text{H}$  Chemical Shifts of Vinyl Group Adjacent to Ether Oxygen in Vinyl Ethers

| Monomer | $\delta^a$ (ppm)      |                      |                      |
|---------|-----------------------|----------------------|----------------------|
|         | tran ( $\text{H}^a$ ) | cis ( $\text{H}^b$ ) | gem ( $\text{H}^c$ ) |
| DEGV    | 4.16                  | 4.36                 | 6.52                 |
| HBVE    | 4.15                  | 4.37                 | 6.51                 |
| HEVE    | 4.17                  | 4.38                 | 6.55                 |
| IBVE    | 3.95                  | 4.17                 | 6.44                 |

Chemical structure of a vinyl ether monomer with protons labeled  $a$ ,  $b$ , and  $c$ .

<sup>a</sup> Measured on a  $^1\text{H}$  NMR (400 MHz) spectrometer at  $20^\circ\text{C}$  using a coaxial system (reference:  $\text{CDCl}_3$  with 0.1% TMS). All the signals are averaged shift values of identical signals. Protons  $\text{H}^a$ ,  $\text{H}^b$ , and  $\text{H}^c$  are shown on the right side of Table S1.

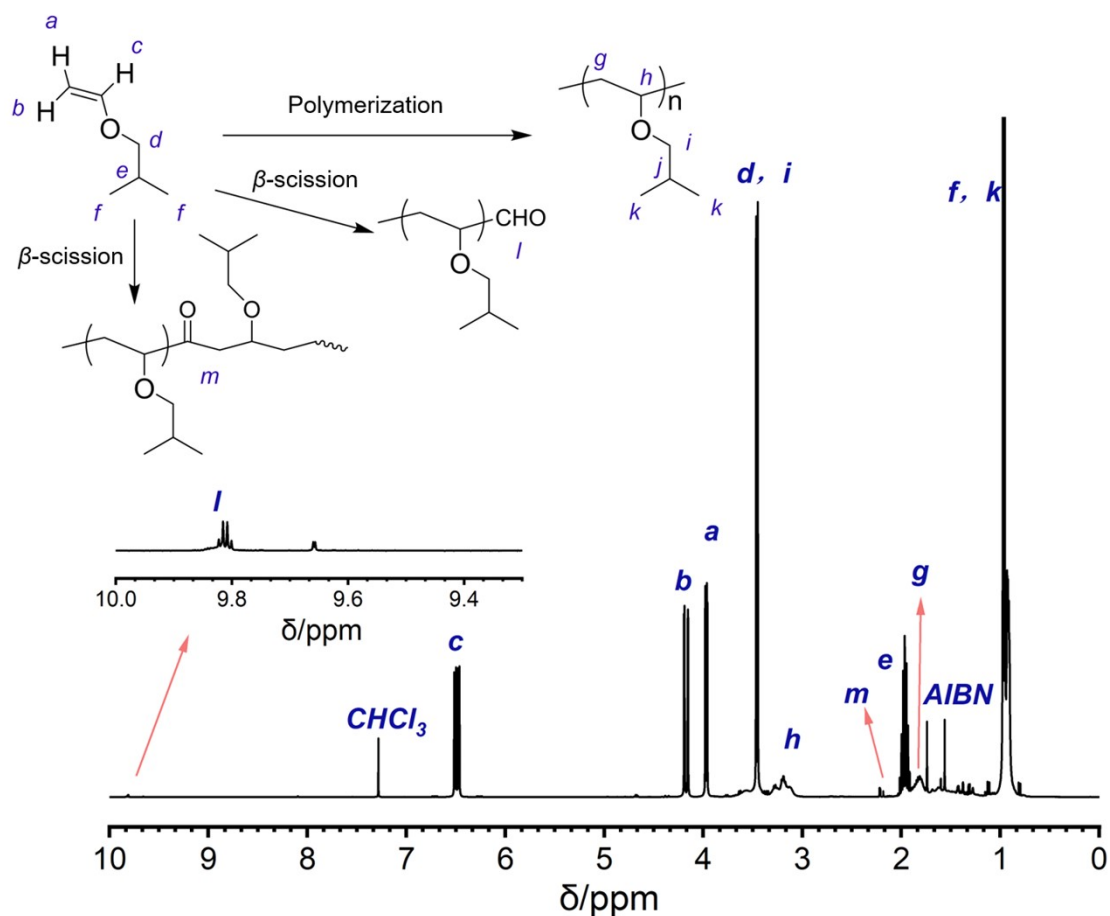

Figure S5.  $^1\text{H}$  NMR spectrum (in  $\text{CDCl}_3$  at  $20\text{ }^\circ\text{C}$ ) of polymerization mixture of IBVE.

The selectivity (%) is obtained by integration values of  $100 \times (g/2) / [c + (g/2) + (l/3)]$ . The conversion (%) can be calculated by integration values of  $100 \times (f/2) / [c + (g/2)]$  in the case of 100 % selectivity.

The structural identification of aldehyde as the terminal end-group of poly(IBVE) is not always performed from its mass spectrum, especially when other oligomers with the same molecular weight may be formed. Notably, an intensive peak assignable to  $-\text{CH}_2\text{C}=\text{OCH}_2-$  protons was observed unexpectedly at 2.3-2.8 ppm although the peak assignable to the terminal  $-\text{CHO}$  end-group generated via  $\beta$ -scission of growing polymer radical as a presumed chain-end forming reaction appeared only weakly at 9.8 ppm.

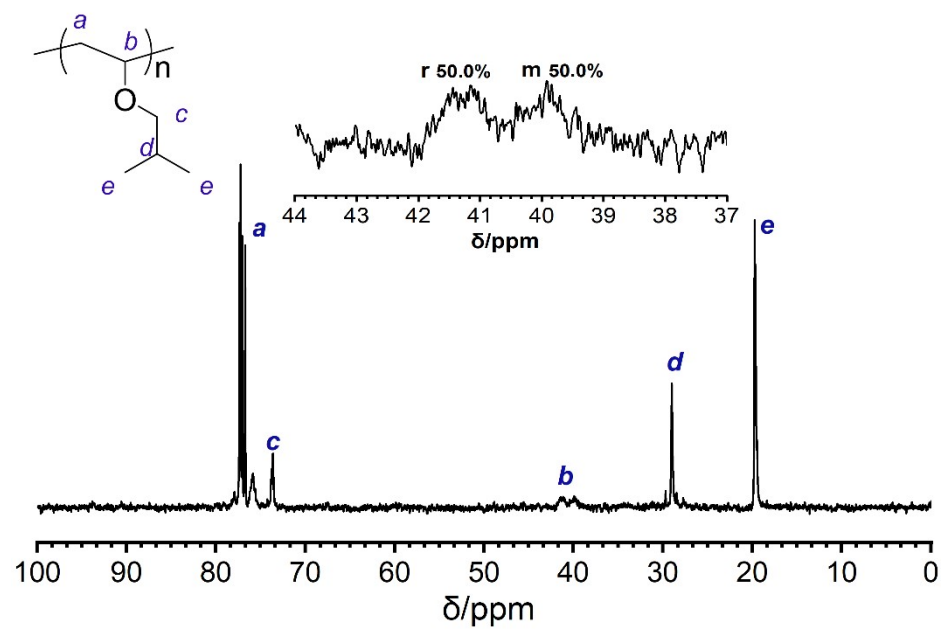

Figure S6.  $^1\text{H}$  NMR spectrum (in  $\text{CDCl}_3$  at  $20^\circ\text{C}$ ) of poly(IBVE).
